# Supplementary material for: The ionothermal synthesis of SIZ-6—a layered aluminophosphate
Source: Royal Society of Chemistry journal article supplement (doi:10.1039/b513458g), 2005-12-06
Supplement: b513458g.pdf [file b513458g.pdf]

# Supplementary Material (ESI) for Chemical Communications  
# This journal is © The Royal Society of Chemistry 2005

## The ionothermal synthesis of SIZ-6 – a layered aluminophosphate

Emily R. Parnham, Paul S. Wheatley and Russell E. Morris\*

*School of Chemistry, University of St. Andrews, St Andrews, Fife, Scotland, UK KY16 9ST. E-mail: rem1@st-and.ac.uk; Fax: +44 1334 463808; Tel: +44 1334 463818*

Supplementary Information

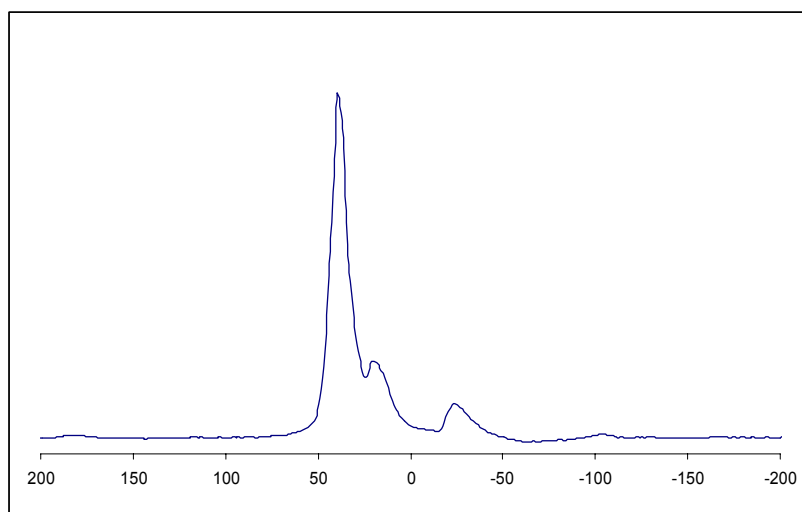

Figure S1.  $^{27}\text{Al}$  MAS NMR spectrum of SIZ-6

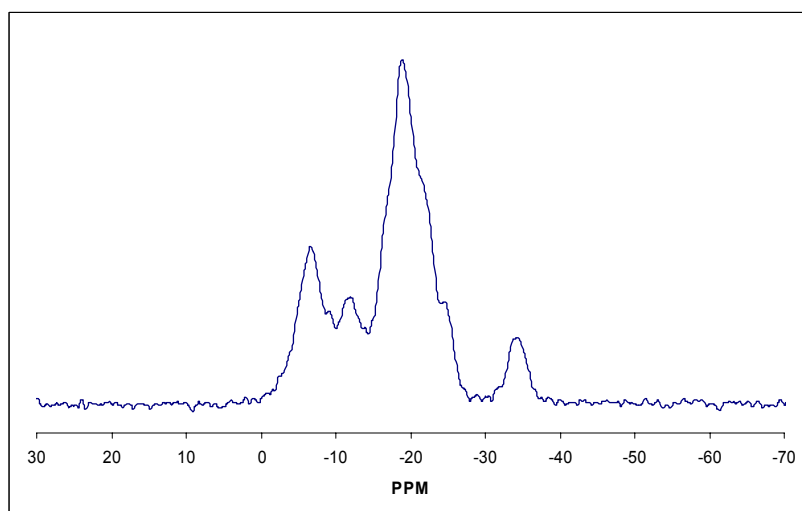

Figure S2.  $^{31}\text{P}$  NMR spectrum of SIZ-6

# Supplementary Material (ESI) for Chemical Communications  
# This journal is © The Royal Society of Chemistry 2005

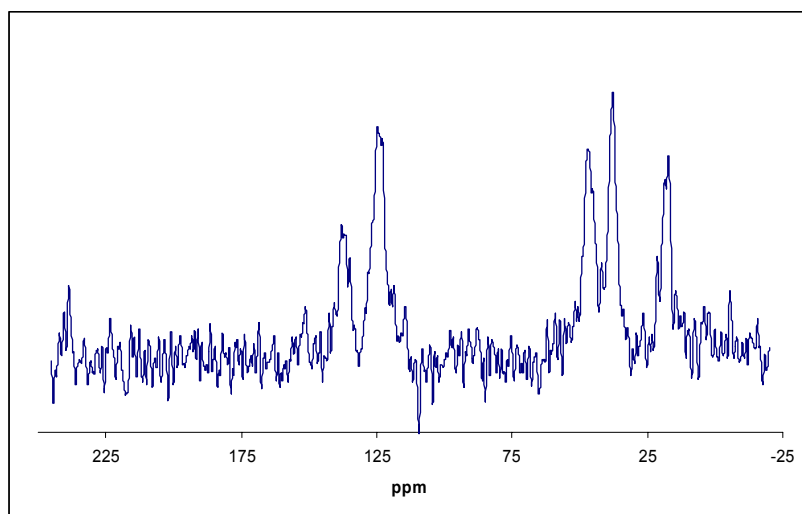

Figure S3. <sup>13</sup>C NMR spectrum of SIZ-6

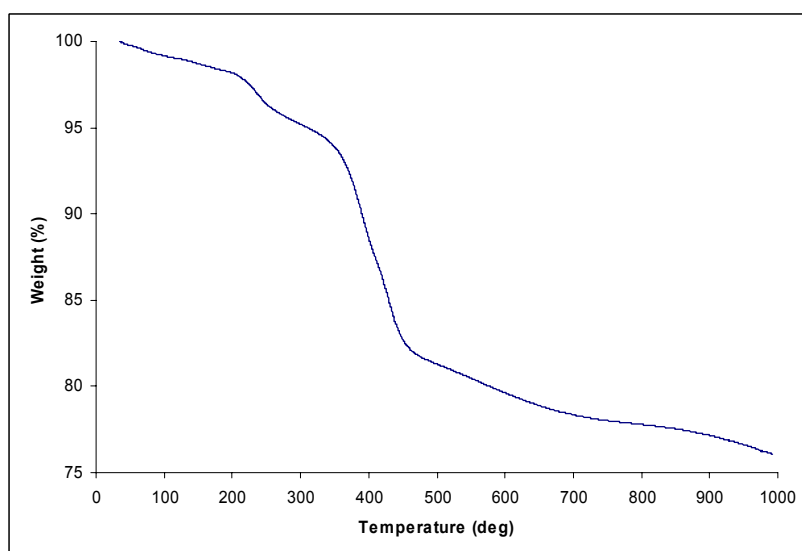

Figure S4 TGA of SIZ-6
